# Supplementary material
Source: Springer Nature journal article supplement (https://www.springermedizin.de/resource/supplementary/13012_2010_372_MOESM4_ESM.pdf/9629858)

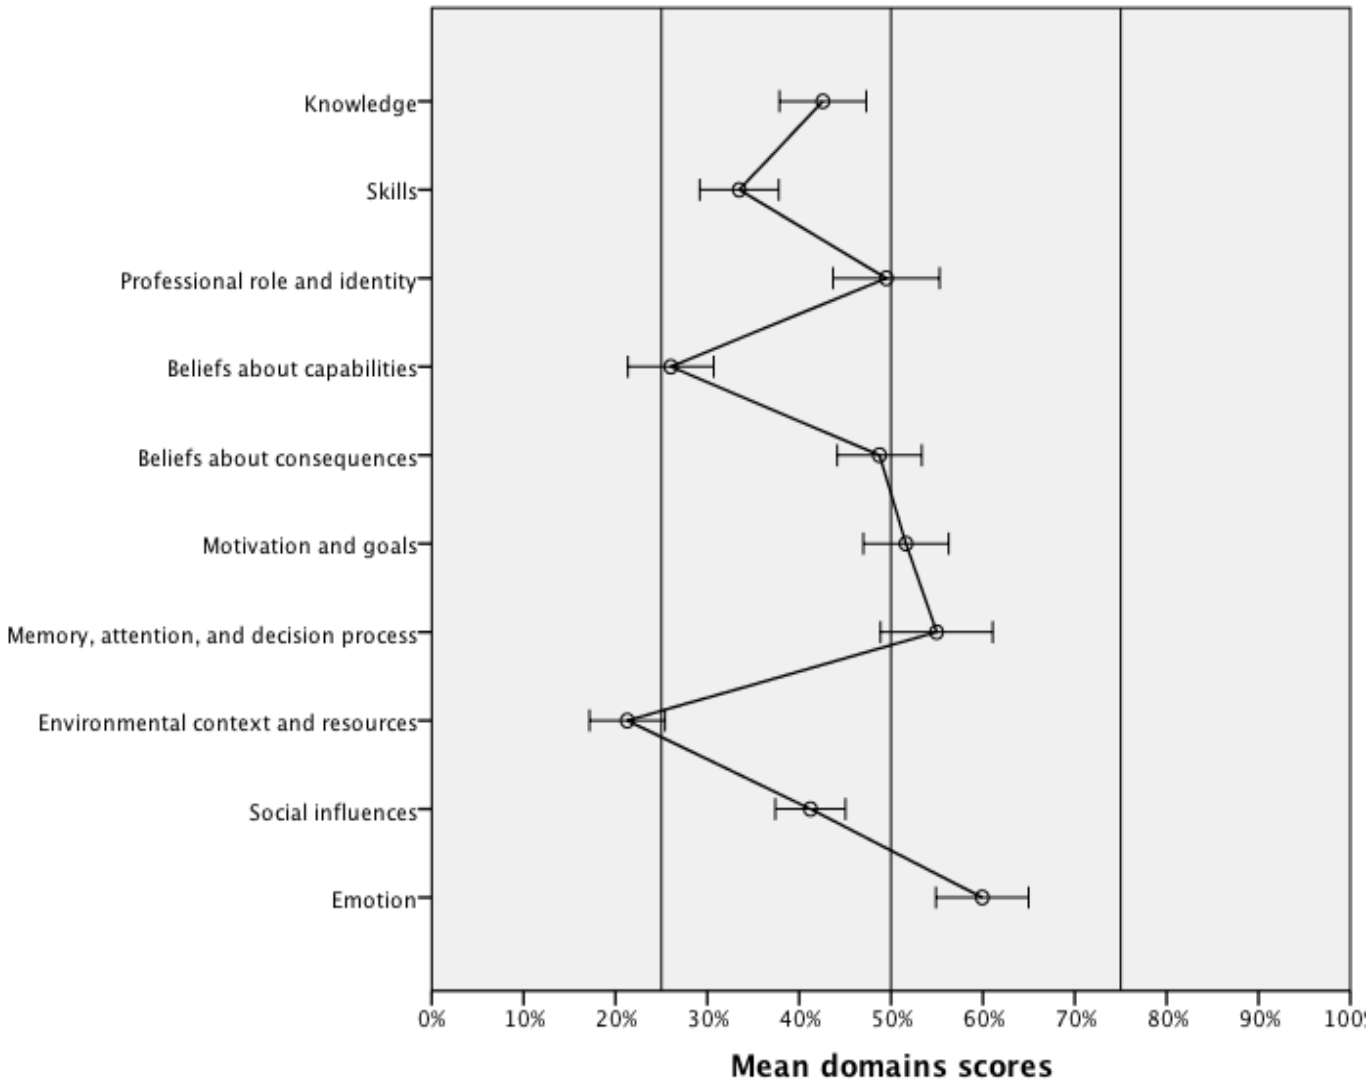

Error bars: 95% confidence intervals

Supplement: MOESM4 [file 9629858]
